# Supplementary material for: The youngest occurrence of embolomeres (Tetrapoda: Anthracosauria) from the Sunjiagou Formation (Lopingian, Permian) of North China
Source: Copernicus journal article supplement (doi:10.5194/fr-23-205-2020), 2020-12-01
Supplement: Supplementary file 1 [file fr-23-205-2020-supplement.zip]

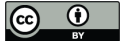

*Supplement of*

**The youngest occurrence of embolomeres (Tetrapoda: Anthracosauria)  
from the Sunjiagou Formation (Lopingian, Permian) of North China**

**Jianye Chen and Jun Liu**

*Correspondence to:* Jianye Chen ([chenjianye@ivpp.ac.cn](mailto:chenjianye@ivpp.ac.cn))

- [fr-23-205-2020-supplement-title-page.pdf](#)
- [Suppl\\_matrix.nex](#)

The copyright of individual parts of the supplement might differ from the CC BY 4.0 License.
